# Supplementary material
Source: PubMed Central journal article supplement (PMC7438279)
Supplement: NIHMS1606602-supplement-Supplemental_Material.pdf [file NIHMS1606602-supplement-Supplemental_Material.pdf]

## SUPPLEMENTAL MATERIAL

Supplemental Table 1

| <b>Supplemental Table 1: The association of GlycA with total HF and its subtypes in the Multi-Ethnic Study of Atherosclerosis (2000 to 2015), after excluding participants with interim CVD events anytime during follow-up</b>                                                                         |                               |                               |                               |                               |                                               |
|---------------------------------------------------------------------------------------------------------------------------------------------------------------------------------------------------------------------------------------------------------------------------------------------------------|-------------------------------|-------------------------------|-------------------------------|-------------------------------|-----------------------------------------------|
| GlycA in $\mu\text{mol/L}$<br>[Median (IQR)]                                                                                                                                                                                                                                                            | Quartile 1<br>[314 (294-327)] | Quartile 2<br>[358 (348-367)] | Quartile 3<br>[396 (386-407)] | Quartile 4<br>[450 (434-475)] | Per 1 SD (60<br>$\mu\text{mol/L}$ ) increment |
| Incidence rates (95% CI) and Hazard ratios (95% CI) of any HF (n=117) by GlycA: N= 5,614 §                                                                                                                                                                                                              |                               |                               |                               |                               |                                               |
| N                                                                                                                                                                                                                                                                                                       | 1,464                         | 1,371                         | 1,414                         | 1,365                         | 5,614                                         |
| Cases                                                                                                                                                                                                                                                                                                   | 19                            | 31                            | 30                            | 37                            | 117                                           |
| Incidence rate†                                                                                                                                                                                                                                                                                         | 1.0 (0.6-1.6)                 | 1.8 (1.2-2.5)                 | 1.7 (1.2-2.4)                 | 2.2 (1.6-3.1)                 | 1.7 (1.4-2.0)                                 |
| Hazard Ratio‡                                                                                                                                                                                                                                                                                           |                               |                               |                               |                               |                                               |
| Model 1                                                                                                                                                                                                                                                                                                 | 1 (reference)                 | 1.72 (0.97-3.05)              | 1.77 (0.99-3.17)              | 2.62 (1.47-4.65)*             | 1.45 (1.21-1.73)*                             |
| Model 2                                                                                                                                                                                                                                                                                                 | 1 (reference)                 | 1.55 (0.87-2.75)              | 1.51 (0.84-2.72)              | 2.00 (1.10-3.63)*             | 1.35 (1.11-1.63)*                             |
| Model 3                                                                                                                                                                                                                                                                                                 | 1 (reference)                 | 1.53 (0.85-2.74)              | 1.48 (0.81-2.68)              | 1.88 (1.02-3.45)*             | 1.30 (1.07-1.57)*                             |
| Model 4                                                                                                                                                                                                                                                                                                 | 1 (reference)                 | 1.48 (0.82-2.67)              | 1.39 (0.75-2.56)              | 1.67 (0.86-3.24)              | 1.27 (1.02-1.59)*                             |
| Incidence rates (95% CI) and Hazard ratios (95% CI) of HFpEF (n=54) by GlycA: N= 5,614 §                                                                                                                                                                                                                |                               |                               |                               |                               |                                               |
| N                                                                                                                                                                                                                                                                                                       | 1,464                         | 1,371                         | 1,414                         | 1,365                         | 5,614                                         |
| Cases                                                                                                                                                                                                                                                                                                   | 8                             | 16                            | 13                            | 17                            | 54                                            |
| Incidence rate†                                                                                                                                                                                                                                                                                         | 0.4 (0.2-0.9)                 | 0.9 (0.6-1.5)                 | 0.7 (0.4-1.3)                 | 1.0 (0.6-1.6)                 | 0.8 (0.6-1.0)                                 |
| Hazard Ratio‡                                                                                                                                                                                                                                                                                           |                               |                               |                               |                               |                                               |
| Model 1                                                                                                                                                                                                                                                                                                 | 1 (reference)                 | 2.07 (0.88-4.86)              | 1.70 (0.70-4.16)              | 2.56 (1.07-6.15)*             | 1.41 (1.10-1.82)*                             |
| Model 2                                                                                                                                                                                                                                                                                                 | 1 (reference)                 | 1.84 (0.78-4.34)              | 1.41 (0.57-3.47)              | 2.02 (0.82-4.96)              | 1.32 (1.00-1.75)*                             |
| Model 3                                                                                                                                                                                                                                                                                                 | 1 (reference)                 | 1.75 (0.73-4.18)              | 1.43 (0.57-3.57)              | 1.97 (0.79-4.96)              | 1.30 (0.99-1.72)                              |
| Model 4                                                                                                                                                                                                                                                                                                 | 1 (reference)                 | 1.65 (0.69-3.97)              | 1.27 (0.50-3.25)              | 1.46 (0.53-4.00)              | 1.18 (0.86-1.64)                              |
| Incidence rates (95% CI) and Hazard ratios (95% CI) of HFrEF (n=53) by GlycA: N= 5,614 §                                                                                                                                                                                                                |                               |                               |                               |                               |                                               |
| N                                                                                                                                                                                                                                                                                                       | 1,464                         | 1,371                         | 1,414                         | 1,365                         | 5,614                                         |
| Cases                                                                                                                                                                                                                                                                                                   | 11                            | 12                            | 15                            | 15                            | 53                                            |
| Incidence rate†                                                                                                                                                                                                                                                                                         | 0.6 (0.3-1.1)                 | 0.7 (0.4-1.2)                 | 0.8 (0.5-1.4)                 | 0.9 (0.5-1.5)                 | 0.8 (0.6-1.0)                                 |
| Hazard Ratio‡                                                                                                                                                                                                                                                                                           |                               |                               |                               |                               |                                               |
| Model 1                                                                                                                                                                                                                                                                                                 | 1 (reference)                 | 1.20 (0.53-2.72)              | 1.64 (0.75-3.61)              | 2.04 (0.91-4.58)              | 1.39 (1.06-1.82)*                             |
| Model 2                                                                                                                                                                                                                                                                                                 | 1 (reference)                 | 1.11 (0.48-2.54)              | 1.41 (0.64-3.14)              | 1.52 (0.65-3.54)              | 1.27 (0.95-1.70)                              |
| Model 3                                                                                                                                                                                                                                                                                                 | 1 (reference)                 | 1.12 (0.49-2.59)              | 1.33 (0.59-2.99)              | 1.42 (0.60-3.67)              | 1.23 (0.91-1.65)                              |
| Model 4                                                                                                                                                                                                                                                                                                 | 1 (reference)                 | 1.12 (0.48-2.59)              | 1.31 (0.56-3.05)              | 1.43 (0.55-3.73)              | 1.27 (0.90-1.79)                              |
| Abbreviations: HF, heart failure; HFpEF, HF with preserved ejection fraction; HFrEF, HF with reduced ejection fraction; CI, confidence interval                                                                                                                                                         |                               |                               |                               |                               |                                               |
| * Statistically significant results at $P < 0.05$ are in bold font                                                                                                                                                                                                                                      |                               |                               |                               |                               |                                               |
| † Incidence rates reported are per 1000 person-years.                                                                                                                                                                                                                                                   |                               |                               |                               |                               |                                               |
| ‡ Hazard ratios are adjusted as follows:                                                                                                                                                                                                                                                                |                               |                               |                               |                               |                                               |
| Model 1: adjusted for age, sex, and race/ethnicity, MESA site                                                                                                                                                                                                                                           |                               |                               |                               |                               |                                               |
| Model 2: model 1 plus education, health insurance, BMI, smoking status, pack-years of smoking, and physical activity.                                                                                                                                                                                   |                               |                               |                               |                               |                                               |
| Model 3: model 2 plus systolic blood pressure, use of antihypertensive medication, total cholesterol, HDL- cholesterol, use of lipid-lowering medications, diabetes and eGFR                                                                                                                            |                               |                               |                               |                               |                                               |
| Model 4: model 3 plus $\ln(\text{CRP})$ , $\ln(\text{IL-6})$ and $\ln(\text{Fibrinogen})$                                                                                                                                                                                                               |                               |                               |                               |                               |                                               |
| § Using GlycA quartiles, $P = 0.23, 0.60$ and $0.52$ for interaction by sex for HF, HFpEF and HFrEF, respectively; $P = 0.79, 0.51$ and $0.82$ for interaction by age for HF, HFpEF and HFrEF, respectively; $P = 0.73, 0.36$ and $0.66$ for interaction by race for HF, HFpEF and HFrEF, respectively. |                               |                               |                               |                               |                                               |
